# Supplementary material
Source: publisher figshare collection journal article supplement (https://acs.figshare.com/ndownloader/files/4151017)
Supplement: Supplementary file 1 [file 4151017]

# Supporting Information

## Self-supporting three-dimensional $\text{ZnIn}_2\text{S}_4$ /PVDF–P(MMA-co-MAA) composite mats with hierarchical nanostructures for high photocatalytic activity

Shengjie Peng,<sup>\*,†,#</sup> Peining Zhu,<sup>‡</sup> Subodh G. Mhaisalkar,<sup>†</sup> and Seeram Ramakrishna<sup>\*,‡</sup>

<sup>†</sup> School of Materials Science and Engineering, Nanyang Technological University, Singapore, 639798

<sup>#</sup> NUS Nanoscience and Nanotechnology Initiative (NUSNNI)-NanoCore, National University of Singapore, 117576

<sup>‡</sup> Department of Mechanical Engineering, National University of Singapore, Singapore, 117574

E-mail address: [sjpeng@ntu.edu.sg](mailto:sjpeng@ntu.edu.sg) (Shengjie Peng), [seeram@nus.edu.sg](mailto:seeram@nus.edu.sg) (Seeram Ramakrishna)

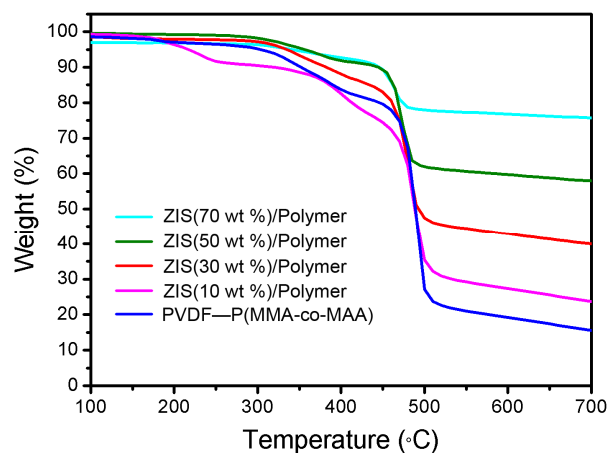

**Figure S1.** Thermal gravity analysis of PVDF–P(MMA-co-MAA) and ZIS/Polymer composite mats with different amounts of  $\text{ZnIn}_2\text{S}_4$  loadings.

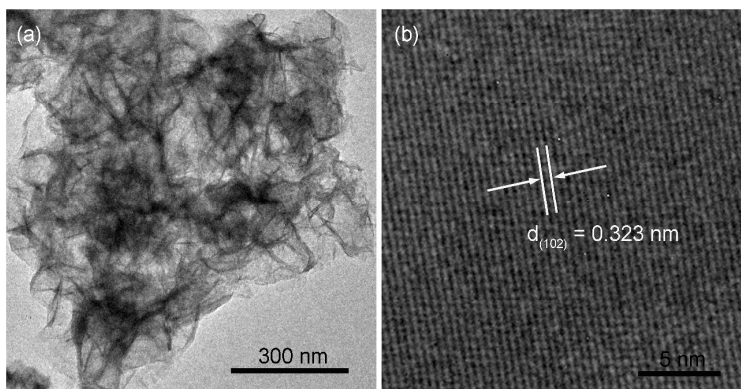

**Figure S2.** TEM (a) and HRTEM (b) of the ZIS nanosheets on the ZIS(50 wt %)/Polymer. The ZIS sheets were obtained by ultrasonic treating the ZIS(50 wt %)/Polymer for 24 h.

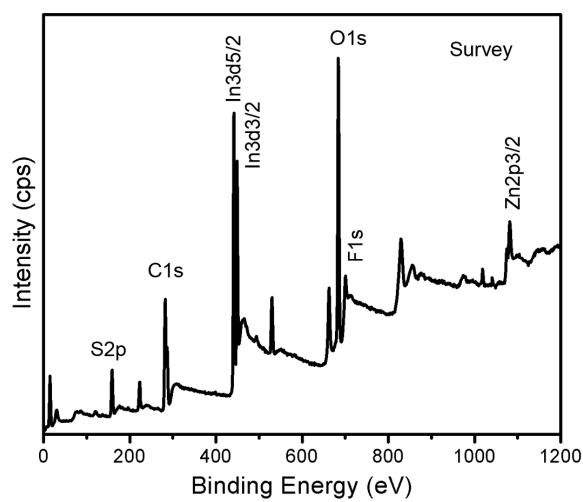

**Figure S3.** XPS survey spectrum of the ZIS (50 wt %)/Polymer composite.

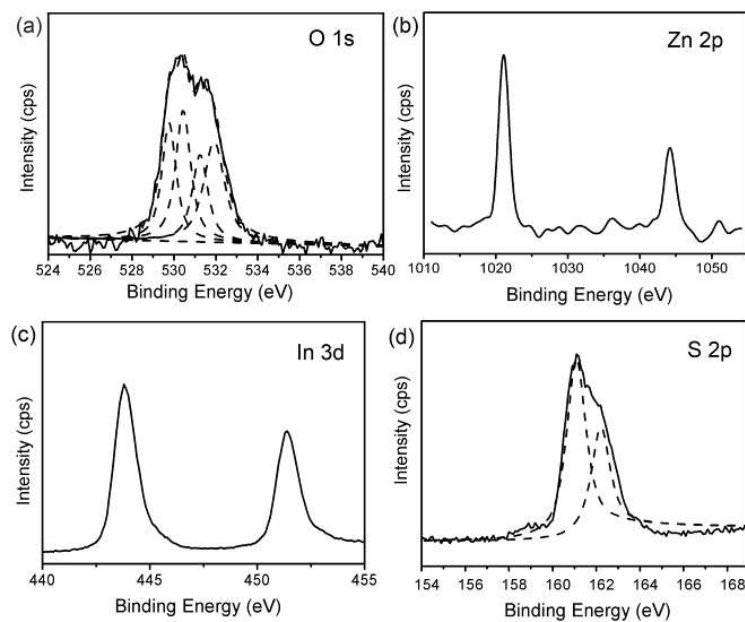

**Figure S4.** IR spectra of the PVDF/P(MMA-co-MAA) (a), ZnIn/Polymer (b), and ZIS(50 wt%)/Polymer samples.

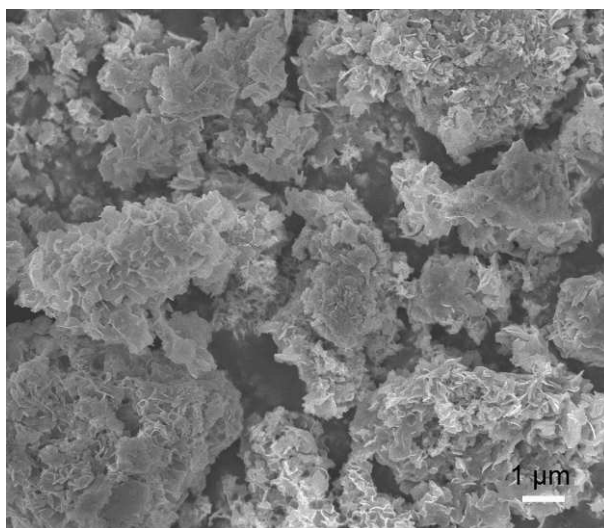

**Figure S5.** SEM image of the  $\text{ZnIn}_2\text{S}_4$  powder obtained by reacting  $\text{Zn}(\text{CH}_3\text{COO})_2$ ,  $\text{InCl}_3$  and TAA at  $160^\circ\text{C}$  for 12 h.

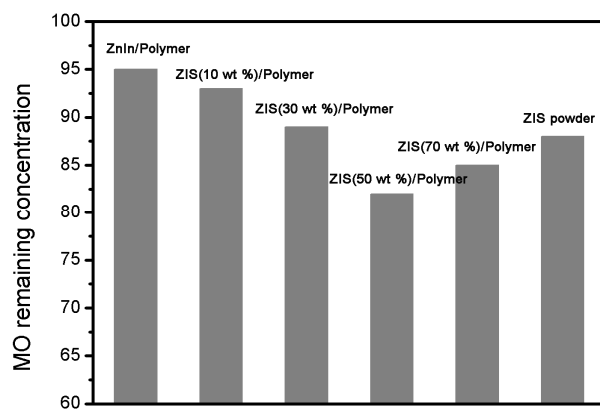

**Figure S6.** Bar plots showing the remaining MO dyes in solutions after reaching the adsorption–desorption equilibrium in the dark for 60 min with stirring.

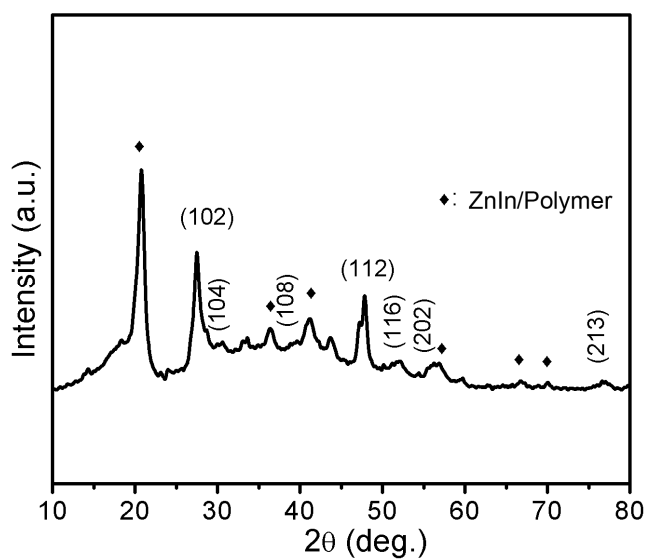

**Figure S7.** XRD of the ZIS(50 wt %)/Polymer after five cycles of photocatalytic degradation.

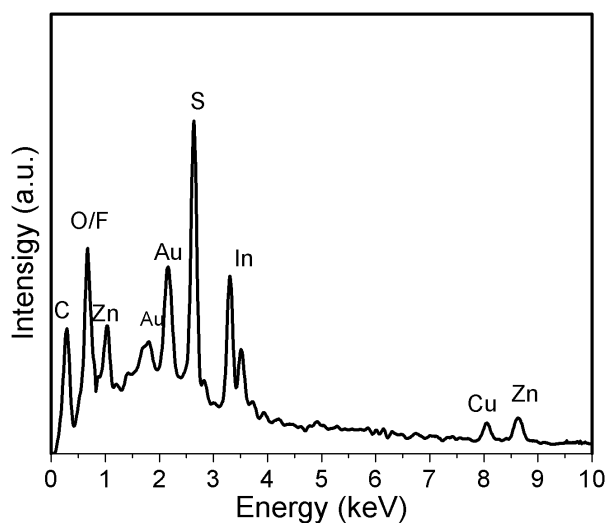

**Figure S8.** EDS of the ZIS(50 wt %)/Polymer after five cycles of photocatalytic degradation.

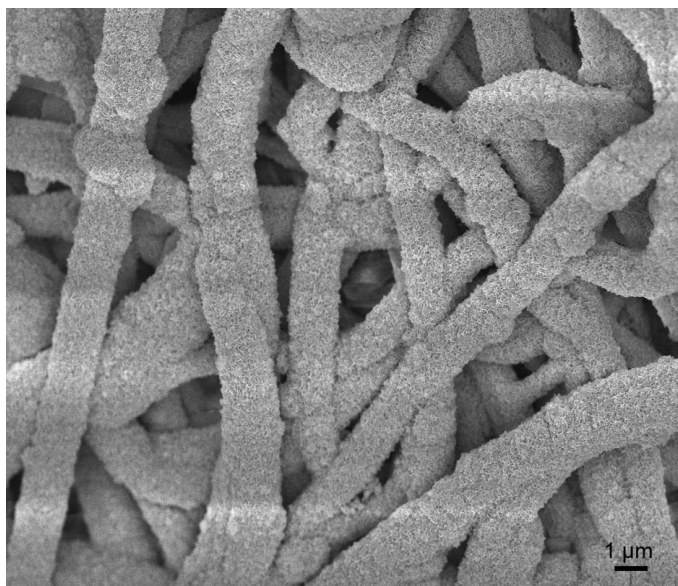

**Figure S9.** SEM image of the ZIS(50 wt %)/Polymer after five cycles of photocatalytic degradation.

Table 1 The  $\text{ZnIn}_2\text{S}_4$  loadings of ZIS/Polymer composites.

| Samples            | Weight loss (wt %) | $\text{ZnIn}_2\text{S}_4$ loading (wt %) | Specific surface area ( $\text{m}^2 \text{g}^{-1}$ ) |
|--------------------|--------------------|------------------------------------------|------------------------------------------------------|
| PVDF-P(MMA-co-MAA) | 76.8               | 0                                        | 35.2                                                 |
| 10%                | 68.9               | 10.3                                     | 42.2                                                 |
| 30%                | 53.1               | 30.9                                     | 48.3                                                 |
| 50%                | 37.9               | 50.7                                     | 59.2                                                 |
| 70%                | 21.5               | 72.0                                     | 53.2                                                 |
